# Supplementary material for: Nitrogen Nutrition Modulates the Response to Alternaria brassicicola Infection via Metabolic Modifications in Arabidopsis Seedlings
Source: MDPI journal article supplement (doi:10.3390/plants13040534), 2024-02-15
Supplement: s1 [file s1]

**Table S4 : Primer sequences for real-time quantitative PCR amplification.**

| <b>Gene</b>      | <b>Forward primer sequence</b> | <b>Reverse primer sequence</b> |
|------------------|--------------------------------|--------------------------------|
| <i>AtActine</i>  | GGTAACATTGTGCTCAGRGGTGG        | AACGACCTTAATCTTCATGCTGC        |
| <i>AtUBQ1</i>    | TTCCTTGATGATGCTTGCTC           | TTGACAGCTCTTGGGTGAAG           |
| <i>AtACL5</i>    | TGGGAAAATGCAAAGTGCTG           | ATAACAACCTTTCTCGATCGTCGTGT     |
| <i>AtADC1</i>    | GTGGTGATAAGGGGAACGACA          | CAACCGAAATAAGACCAATTCTCAT      |
| <i>AtADC2</i>    | GCGATGGACCACACAGCTT            | AGAACATCCGCTGAGGACTGA          |
| <i>AtCYP79B2</i> | CTCGCGAGACTTCTCAAGG            | CCATAACCAACGGTTTAGCC           |
| <i>AtCYP81F2</i> | TGGCTATGCGTAAACTCGTG           | CCGGTAAACTTCAAAATGGTG          |
| <i>AtCYP83B1</i> | TTCATGAACGAGCACAAAGG           | CATTGCAATCCCAAGATGC            |
| <i>AtMYB51</i>   | TCGAACTTTGACGTTGATGG           | CGAAATTATCGCAGTACATTAGAGG      |
| <i>AtPAD3</i>    | AACCCACCATTAAAGGAGC            | TCATAAAATATATACGGCGTCG         |
| <i>AtPAO1</i>    | GCTCTAACATTCTGGTGGTGACG        | CCCAAACATGTCCCTGAGAACAC        |
| <i>AtPAO3</i>    | ACAAACCTCACGACCTCTATG          | TCAAGCACACGCATCCTG             |
| <i>AtPAO4</i>    | GGGAACAGTGACATTCTCGAAAC        | AATTGGAACCCTGCTTCTGTCTG        |
| <i>AtPDF1.2</i>  | TTGCTGCTTTCGACGCA              | TGTCCCACTTGGCTTCTCG            |
| <i>AtPR1</i>     | GGTTAGCGAGAAGGCTAACTAC         | CATCCGAGTCTCACTGACTTTC         |
| <i>AtSPDS1</i>   | GGATCCTCGCGTGAACCTT            | CGTATGATCCTTCAGCAGCATTC        |
| <i>AtSPDS2</i>   | AATCGGTCCAGCAAAAGAGC           | GGTCCAAGCGTAGTTAACAGATCC       |
| <i>AtSPMS</i>    | TGCTGCTGAGTTCCTCCGTA           | AGCAGGACCTACGGGATCTG           |
| <i>AtST5A</i>    | ATGGCTGCTCGTATTGATGG           | CCGCACCAAATAACAGAAGG           |
| <i>AtTGG1</i>    | GTTGGTGATCGGCTTCCAGA           | GAGAGTTGTGCGTGAGTCCA           |
| <i>AtTGG2</i>    | GGCTTCACTCACCGATACCC           | AGGCGTTATGTTCTTGCGA            |
