# Supplementary material for: Nitrogen Nutrition Modulates the Response to Alternaria brassicicola Infection via Metabolic Modifications in Arabidopsis Seedlings
Source: MDPI journal article supplement (doi:10.3390/plants13040534), 2024-02-15
Supplement: s1 [file s1]

**Table S3 : Ammonium and inorganic ion contents in Col-0 or *Ler* seedlings grown on different nutritive media (0.1 mM NO<sub>3</sub><sup>-</sup>, 5 mM NO<sub>3</sub><sup>-</sup> and 5 mM NH<sub>4</sub><sup>+</sup>) after treatment with sterile H<sub>2</sub>O or inoculation with the fungus (Abra43), 14 DAI.**

| Inorganic ion content<br>( $\mu\text{mol} / \text{g DW}$ ) | 0.1 mM $\text{NO}_3^-$       |                    |                          |                    | 5 mM $\text{NO}_3^-$           |                                |                              |                               | 5 mM $\text{NH}_4^+$          |                                 |                                 |                               | Mean for each ion         |
|------------------------------------------------------------|------------------------------|--------------------|--------------------------|--------------------|--------------------------------|--------------------------------|------------------------------|-------------------------------|-------------------------------|---------------------------------|---------------------------------|-------------------------------|---------------------------|
|                                                            | $\text{H}_2\text{O}$         |                    | Abra43                   |                    | $\text{H}_2\text{O}$           |                                | Abra43                       |                               | $\text{H}_2\text{O}$          |                                 | Abra43                          |                               |                           |
|                                                            | Col-0                        | Ler                | Col-0                    | Ler                | Col-0                          | Ler                            | Col-0                        | Ler                           | Col-0                         | Ler                             | Col-0                           | Ler                           |                           |
| Ammonium                                                   | 15.76 ± 11.27 (B)            | 7.23 ± 3.67 (B)    | 15.88 ± 6.42 (B)         | 12.91 ± 4.17 (B)   | 8.39 ± 1.73 (B)                | 10.39 ± 1.94 (B)               | 13.08 ± 2.01 (B)             | 12.83 ± 1.20 (B)              | 58.58 ± 3.99 (b, A, $\beta$ ) | 128.36 ± 8.82 (a, A, $\alpha$ ) | 92.01 ± 13.61 (a, A, $\alpha$ ) | 37.03 ± 8.20 (b, A, $\beta$ ) | 34.29 ± 6.61 (c')         |
| Chloride                                                   | 366.52 ± 79.95 (B)           | 263.40 ± 90.48 (B) | 221.15 ± 74.46 (B)       | 255.99 ± 27.77     | 65.89 ± 8.91 (C)               | 42.81 ± 3.50 (C)               | 121.52 ± 5.59 (B)            | 69.97 ± 2.74                  | 611.63 ± 79.54 (A)            | 714.64 ± 39.26 (A, a)           | 426.59 ± 99.08 (a, A)           | 235.27 ± 103.24 (b, B)        | 282.95 ± 37.93 (a')       |
| Nitrate                                                    | 15.21 ± 0.36 (B)             | 43.19 ± 24.38 (B)  | 53.16 ± 48.05 (B)        | 42.43 ± 36.10 (B)  | 978.49 ± 193.70 (A, $\alpha$ ) | 1036.22 ± 86.52 (A, $\alpha$ ) | 613.76 ± 51.70 (A, $\beta$ ) | 441.35 ± 131.19 (A, $\beta$ ) | 6.60 ± 0.93 (B)               | 17.35 ± 2.46 (B)                | 5.24 ± 0.44 (B)                 | 12.43 ± 2.52 (B)              | 272.12 ± 66.54 (a')       |
| Phosphate                                                  | 110.47 ± 10.41               | 42.99 ± 13.24      | 175.11 ± 19.36 (a)       | 93.43 ± 22.48 (b)  | 76.70 ± 11.43                  | 33.51 ± 2.53                   | 100.40 ± 50.23               | 41.97 ± 5.26                  | 97.78 ± 13.31                 | 90.71 ± 4.82                    | 98.46 ± 60.54                   | 62.28 ± 29.05                 | 85.32 ± 8.92 (bc')        |
| Sulfate                                                    | 175.75 ± 37.45 (A)           | 138.14 ± 51.26     | 186.46 ± 46.65 (A)       | 157.89 ± 41.30 (A) | 159.88 ± 20.09 (A)             | 122.21 ± 3.00                  | 188.83 ± 3.15 (A)            | 141.60 ± 10.98 (A)            | 58.93 ± 3.84 (B)              | 110.66 ± 23.28                  | 52.13 ± 18.41 (B)               | 32.00 ± 15.81 (B)             | 127.04 ± 11.01 (b')       |
|                                                            | Col-0 mean                   |                    |                          |                    |                                |                                |                              |                               | Ler mean                      |                                 |                                 |                               |                           |
| Ammonium                                                   | 33.95 ± 7.97                 |                    |                          |                    |                                |                                |                              |                               | 34.79 ± 10.87                 |                                 |                                 |                               |                           |
| Chloride                                                   | 302.22 ± 51.14               |                    |                          |                    |                                |                                |                              |                               | 263.68 ± 57.13                |                                 |                                 |                               |                           |
| Nitrate                                                    | 278.74 ± 96.82               |                    |                          |                    |                                |                                |                              |                               | 265.50 ± 94.09                |                                 |                                 |                               |                           |
| Phosphate                                                  | 109.82 ± 13.89 (a)           |                    |                          |                    |                                |                                |                              |                               | 60.82 ± 8.01 (b)              |                                 |                                 |                               |                           |
| Sulfate                                                    | 137.00 ± 16.91               |                    |                          |                    |                                |                                |                              |                               | 117.08 ± 14.19                |                                 |                                 |                               |                           |
|                                                            | 0.1 mM $\text{NO}_3^-$ mean  |                    |                          |                    | 5 mM $\text{NO}_3^-$ mean      |                                |                              |                               | 5 mM $\text{NH}_4^+$ mean     |                                 |                                 |                               |                           |
| Ammonium                                                   | 12.95 ± 3.19 (B)             |                    |                          |                    | 11.17 ± 0.94 (B)               |                                |                              |                               | 78.99 ± 10.89 (A)             |                                 |                                 |                               |                           |
| Chloride                                                   | 276.77 ± 34.89 (B)           |                    |                          |                    | 75.05 ± 9.01 (C)               |                                |                              |                               | 497.03 ± 65.83 (A)            |                                 |                                 |                               |                           |
| Nitrate                                                    | 38.50 ± 14.47 (B)            |                    |                          |                    | 767.45 ± 92.51 (A)             |                                |                              |                               | 10.41 ± 38.50 (B)             |                                 |                                 |                               |                           |
| Phosphate                                                  | 105.50 ± 15.99 (A)           |                    |                          |                    | 63.15 ± 13.71 (B)              |                                |                              |                               | 87.31 ± 15.29 (AB)            |                                 |                                 |                               |                           |
| Sulfate                                                    | 164.56 ± 19.76 (A)           |                    |                          |                    | 153.13 ± 8.91 (A)              |                                |                              |                               | 63.43 ± 11.34 (B)             |                                 |                                 |                               |                           |
|                                                            | H <sub>2</sub> O mean        |                    |                          |                    |                                |                                | Abra43 mean                  |                               |                               |                                 |                                 |                               |                           |
| Ammonium                                                   | 38.12 ± 10.91                |                    |                          |                    |                                |                                | 30.62 ± 7.56                 |                               |                               |                                 |                                 |                               |                           |
| Chloride                                                   | 344.15 ± 64.86 ( $\alpha$ )  |                    |                          |                    |                                |                                | 221.75 ± 35.71 ( $\beta$ )   |                               |                               |                                 |                                 |                               |                           |
| Nitrate                                                    | 349.51 ± 116.82 ( $\alpha$ ) |                    |                          |                    |                                |                                | 194.73 ± 62.29 ( $\beta$ )   |                               |                               |                                 |                                 |                               |                           |
| Phosphate                                                  | 75.36 ± 7.68                 |                    |                          |                    |                                |                                | 95.27 ± 16.03                |                               |                               |                                 |                                 |                               |                           |
| Sulfate                                                    | 127.59 ± 13.47               |                    |                          |                    |                                |                                | 126.49 ± 17.81               |                               |                               |                                 |                                 |                               |                           |
|                                                            | Nitrogen (N) effect          |                    | Inoculation (I) effect   |                    | Genotype (G) effect            |                                | N x I effect                 |                               | N x G effect                  |                                 | I x G effect                    |                               | N x I x G effect          |
| Ammonium                                                   | 1.17e <sup>-11</sup> ***     |                    | 0.215                    |                    | 0.857                          |                                | 0.014 *                      |                               | 0.093                         |                                 | 1.323e <sup>-11</sup> ***       |                               | 7.586e <sup>-11</sup> *** |
| Chloride                                                   | 1.087e <sup>-6</sup> ***     |                    | 2.973e <sup>-11</sup> ** |                    | 0.308                          |                                | 1.307e <sup>-11</sup> **     |                               | 0.994                         |                                 | 0.414                           |                               | 0.075                     |
| Nitrate                                                    | 1.579e <sup>-11</sup> ***    |                    | 1.70e <sup>-11</sup> **  |                    | 0.765                          |                                | 1.036e <sup>-11</sup> ***    |                               | 0.778                         |                                 | 0.310                           |                               | 0.533                     |
| Phosphate                                                  | 0.101                        |                    | 0.209                    |                    | 4.051e <sup>-11</sup> **       |                                | 0.186                        |                               | 0.388                         |                                 | 0.533                           |                               | 0.976                     |
| Sulfate                                                    | 5.126e <sup>-11</sup> ***    |                    | 0.947                    |                    | 0.235                          |                                | 0.213                        |                               | 0.312                         |                                 | 0.467                           |                               | 0.578                     |
