# Supplementary material for: Nitrogen Nutrition Modulates the Response to Alternaria brassicicola Infection via Metabolic Modifications in Arabidopsis Seedlings
Source: MDPI journal article supplement (doi:10.3390/plants13040534), 2024-02-15

**Figure S1.** Supervised multivariate analysis (OPLS) demonstrating (a) the determination of genotype in a given condition of inoculation and N nutrition (vertical axis) according to healthy area index (HAI, horizontal axis) and (b) the determination of metabolites (vertical axis) according to HAI (horizontal axis).

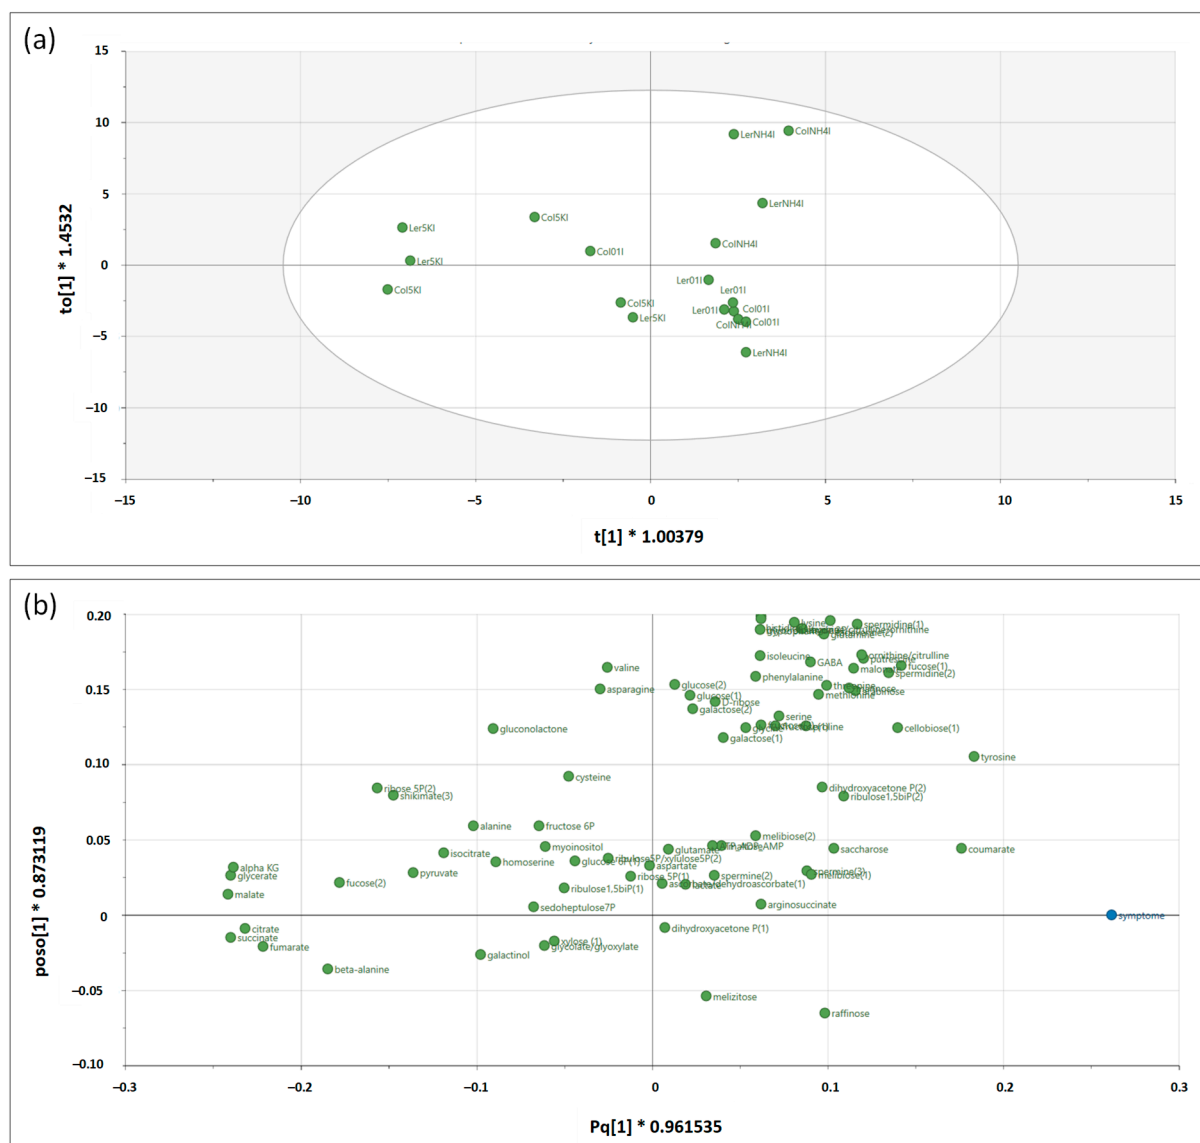

Supplement: s1 [file s1]
