# Supplementary material for: Nitrogen Nutrition Modulates the Response to Alternaria brassicicola Infection via Metabolic Modifications in Arabidopsis Seedlings
Source: MDPI journal article supplement (doi:10.3390/plants13040534), 2024-02-15
Supplement: s1 [file s1]

**Table S1 : Seed germination. (a) Time required for seeds to reach 50% germination (T50 ; in hours) and (b) maximum germination (in %) for seeds of the two genotypes Col-0 and Ler sown on different nutrient media (0.1 mM NO<sub>3</sub><sup>-</sup>, 5 mM NO<sub>3</sub><sup>-</sup> or 5 mM NH<sub>4</sub><sup>+</sup>) after treatment with sterile H<sub>2</sub>O or inoculation with the fungus (Abra43).**

(a)

| T50                    | 0.1 mM NO <sub>3</sub> <sup>−</sup> |                     | 5 mM NO <sub>3</sub> <sup>−</sup> |                        | 5 mM NH <sub>4</sub> <sup>+</sup> |                    |
|------------------------|-------------------------------------|---------------------|-----------------------------------|------------------------|-----------------------------------|--------------------|
|                        | H <sub>2</sub> O                    | Abra43              | H <sub>2</sub> O                  | Abra43                 | H <sub>2</sub> O                  | Abra43             |
| Col-0                  | 27 ± 0.34 (b, A)                    | 26.5 ± 0.32 (b, AB) | 26.7 ± 0.19 (b, A)                | 26.8 ± 0.25 (b, A)     | 25.6 ± 0.22 (b, B)                | 25.8 ± 0.20 (b, B) |
| Ler                    | 37.4 ± 0.94 (a, A)                  | 36.7 ± 0.83 (a)     | 37.1 ± 0.62 (a, AB)               | 37.6 ± 0.97 (a)        | 34.6 ± 0.47 (a, B)                | 35.5 ± 0.58 (a)    |
| Genotype (G) effect    |                                     |                     |                                   | <2e <sup>−16</sup> *** |                                   |                    |
| Nitrogen (N) effect    |                                     |                     |                                   | <2e <sup>−16</sup> *** |                                   |                    |
| Inoculation (I) effect |                                     |                     |                                   | 0.686                  |                                   |                    |
| G x N effect           |                                     |                     |                                   | 0.458                  |                                   |                    |
| G x I effect           |                                     |                     |                                   | 0.686                  |                                   |                    |
| N x I effect           |                                     |                     |                                   | 0.375                  |                                   |                    |
| G x I x N effect       |                                     |                     |                                   | 0.922                  |                                   |                    |
| Mean of G              | Col-0                               |                     |                                   | Ler                    |                                   |                    |
|                        | 26.4 ± 0.13 (b)                     |                     |                                   | 36.5 ± 0.34 (a)        |                                   |                    |
| Mean of N              | 0.1 mM NO <sub>3</sub> <sup>−</sup> |                     | 5 mM NO <sub>3</sub> <sup>−</sup> |                        | 5 mM NH <sub>4</sub> <sup>+</sup> |                    |
|                        | 31.9 ± 1.12                         |                     | 32.0 ± 1.14                       |                        | 30.4 ± 1.00                       |                    |
| Mean of I              | H <sub>2</sub> O                    |                     |                                   | Abra43                 |                                   |                    |
|                        | 31.4 ± 0.88                         |                     |                                   | 31.5 ± 0.90            |                                   |                    |

(b)

| Maximum germination (%) | 0.1 mM NO <sub>3</sub> <sup>−</sup> |             | 5 mM NO <sub>3</sub> <sup>−</sup> |                        | 5 mM NH <sub>4</sub> <sup>+</sup> |             |
|-------------------------|-------------------------------------|-------------|-----------------------------------|------------------------|-----------------------------------|-------------|
|                         | H <sub>2</sub> O                    | Abra43      | H <sub>2</sub> O                  | Abra43                 | H <sub>2</sub> O                  | Abra43      |
| Col-0                   | 99.7 ± 0.28                         | 99.7 ± 0.28 | 99.7 ± 0.26 (a)                   | 99.7 ± 0.28 (a)        | 99.7 ± 0.31                       | 100 ± 0     |
| Ler                     | 98.1 ± 1.15                         | 98.1 ± 0.82 | 97.6 ± 0.65 (b)                   | 97.3 ± 0.68 (b)        | 98.7 ± 0.64                       | 98.0 ± 1.02 |
| Genotype (G) effect     |                                     |             |                                   | <2e <sup>−16</sup> *** |                                   |             |
| Nitrogen (N) effect     |                                     |             |                                   | 0.495                  |                                   |             |
| Inoculation (I) effect  |                                     |             |                                   | 0.458                  |                                   |             |
| G x N effect            |                                     |             |                                   | 0.807                  |                                   |             |
| G x I effect            |                                     |             |                                   | 0.581                  |                                   |             |
| N x I effect            |                                     |             |                                   | 1                      |                                   |             |
| G x I x N effect        |                                     |             |                                   | 1                      |                                   |             |
| Mean of G               | Col-0                               |             |                                   | Ler                    |                                   |             |
|                         | 99.8 ± 0.10 (a)                     |             |                                   | 98.0 ± 0.33 (b)        |                                   |             |
| Mean of N               | 0.1 mM NO <sub>3</sub> <sup>−</sup> |             | 5 mM NO <sub>3</sub> <sup>−</sup> |                        | 5 mM NH <sub>4</sub> <sup>+</sup> |             |
|                         | 98.9 ± 0.38                         |             | 98.6 ± 0.34                       |                        | 99.1 ± 0.33                       |             |
| Mean of I               | H <sub>2</sub> O                    |             |                                   | Abra43                 |                                   |             |
|                         | 98.9 ± 0.28                         |             |                                   | 98.8 ± 0.29            |                                   |             |
