# Supplementary material for: Nitrogen Nutrition Modulates the Response to Alternaria brassicicola Infection via Metabolic Modifications in Arabidopsis Seedlings
Source: MDPI journal article supplement (doi:10.3390/plants13040534), 2024-02-15
Supplement: s1 [file s1]

**Table S2** : Seedling aerial development. (a) Average values of green area, in square millimetres, for Col-0 or *Ler* seedlings grown on different nutritive media (0.1 mM NO<sub>3</sub><sup>-</sup>, 5 mM NO<sub>3</sub><sup>-</sup> and 5 mM NH<sub>4</sub><sup>+</sup>), 14 DAI with sterile H<sub>2</sub>O. (b) Average values of green area ratio (Healthy Area Index, HAI) between seedlings treated with H<sub>2</sub>O and seedlings inoculated with the fungus (Abra43), for Col-0 or *Ler* seedlings grown on different nutritive media (0.1 mM NO<sub>3</sub><sup>-</sup>, 5 mM NO<sub>3</sub><sup>-</sup> and 5 mM NH<sub>4</sub><sup>+</sup>), 14 DAI.

(a)

| Green area (mm <sup>2</sup> ) | 0.1 mM NO <sub>3</sub> <sup>-</sup> | 5 mM NO <sub>3</sub> <sup>-</sup> | 5 mM NH <sub>4</sub> <sup>+</sup> | Genotype mean |
|-------------------------------|-------------------------------------|-----------------------------------|-----------------------------------|---------------|
| Col-0                         | 27.5 ± 1.3 (a, B)                   | 133.6 ± 22.5 (A)                  | 27.1 ± 2.1 (a, B)                 | 62.7 ± 11.7   |
| <i>Ler</i>                    | 19.7 ± 2.1 (b, B)                   | 93.1 ± 15.5 (A)                   | 15.3 ± 1.3 (b, B)                 | 42.7 ± 9.0    |
| Nitrogen condition mean       | 23.6 ± 1.4 (B)                      | 113.3 ± 14.3 (A)                  | 21.2 ± 1.8 (B)                    | 52.7 ± 7.7    |
| Genotype (G) effect           | 0.026 *                             |                                   |                                   |               |
| Nitrogen (N) effect           | < 2e <sup>-16</sup> ***             |                                   |                                   |               |
| G x N effect                  | 0.428                               |                                   |                                   |               |

(b)

| Fungus impact (HAI, %)  | 0.1 mM NO <sub>3</sub> <sup>-</sup> | 5 mM NO <sub>3</sub> <sup>-</sup> | 5 mM NH <sub>4</sub> <sup>+</sup> | Genotype mean  |
|-------------------------|-------------------------------------|-----------------------------------|-----------------------------------|----------------|
| Col-0                   | 81.5 ± 4.6 (b, A)                   | 51.8 ± 9.5 (b, B)                 | 93.5 ± 3.2 (A)                    | 75.6 ± 4.8 (b) |
| <i>Ler</i>              | 92.8 ± 2.0 (a, A)                   | 71.0 ± 4.8 (a, B)                 | 93.9 ± 2.1 (A)                    | 85.9 ± 2.3 (a) |
| Nitrogen condition mean | 87.1 ± 2.4 (A)                      | 61.4 ± 5.6 (B)                    | 93.7 ± 1.8 (A)                    | 80.7 ± 2.6     |
| Genotype (G) effect     | <2e <sup>-16</sup> ***              |                                   |                                   |                |
| Nitrogen (N) effect     | <2e <sup>-16</sup> ***              |                                   |                                   |                |
| G x N effect            | 0.595                               |                                   |                                   |                |
